# Supplementary material for: Development of Guar Gum Hydrogel Containing Sesamol-Loaded Nanocapsules Designed for Irritant Contact Dermatitis Treatment Induced by Croton Oil Application
Source: MDPI journal article supplement (doi:10.3390/pharmaceutics15010285), 2023-01-14
Supplement: s1 [file s1]

# Supplementary Materials: Development of guar gum hydrogel containing sesamol-loaded nanocapsules designed for the irritant contact dermatitis treatment induced by the croton oil application

Vinicius Costa Prado; Kauani Moenke; Bárbara Felin Osmari; Natháli Schopf Pegoraro; Sara Marchesan de Oliveira; Leticia Cruz

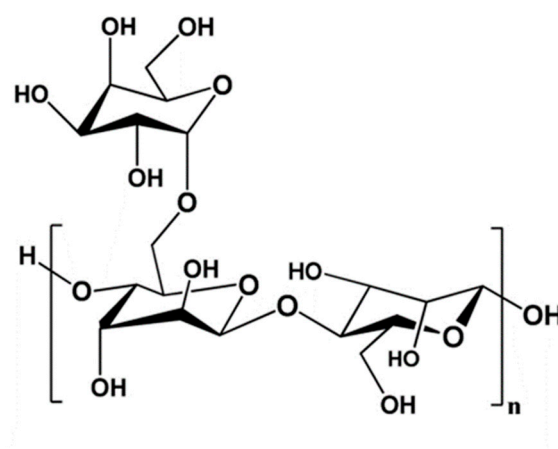

Figure S1. Chemical structure of guar gum.

A

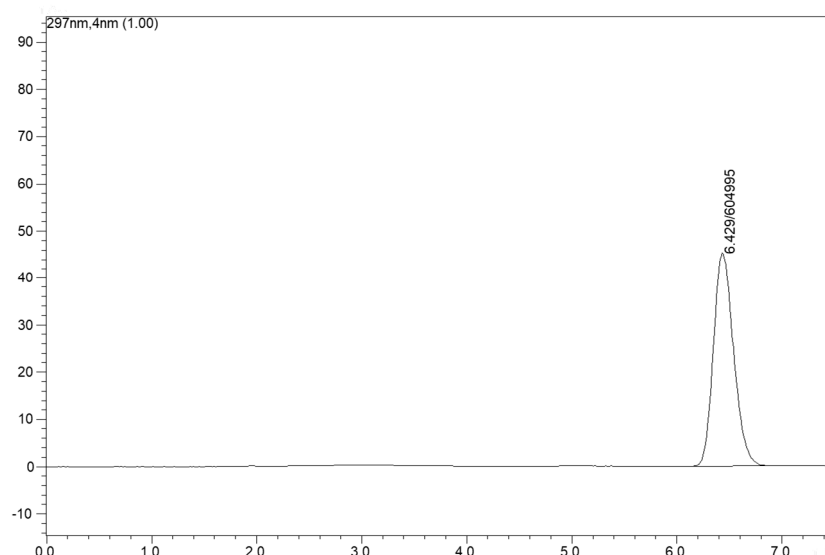

B

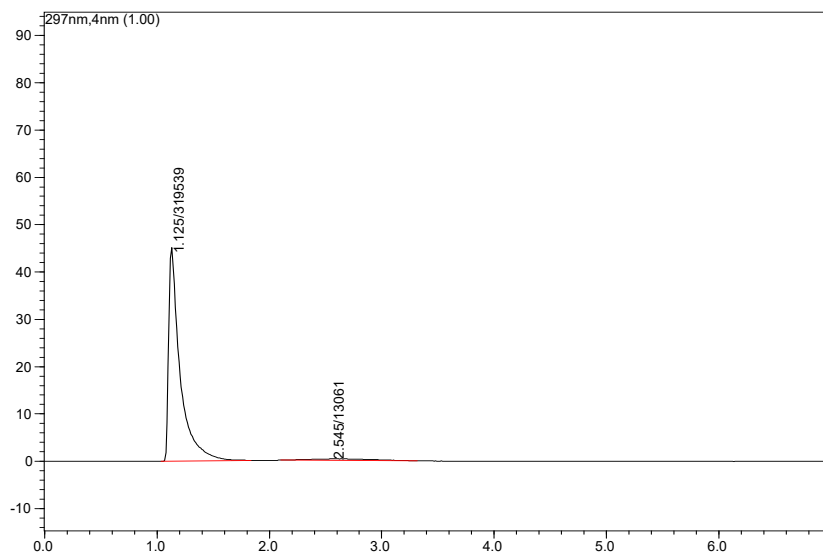

**Figure S2.** Representative chromatographic profiles of sesamol (15 µg/mL - chromatogram A) and NC placebo (chromatogram B) at 297 nm.

A

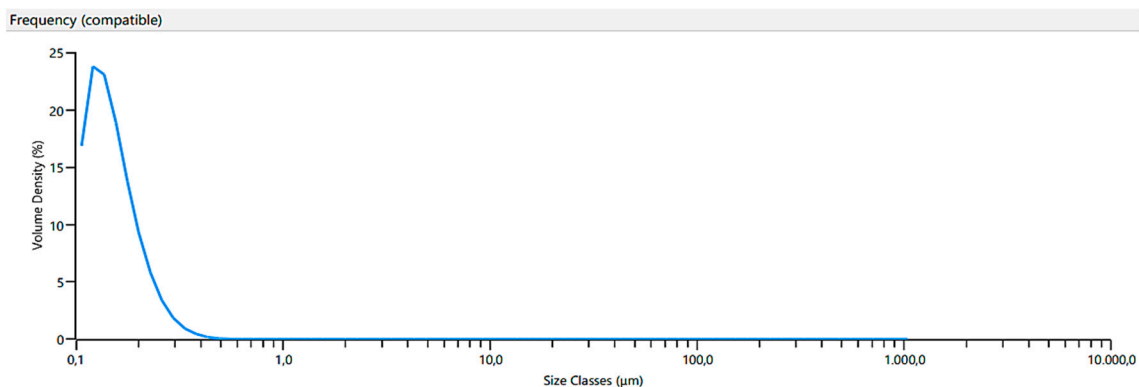

B

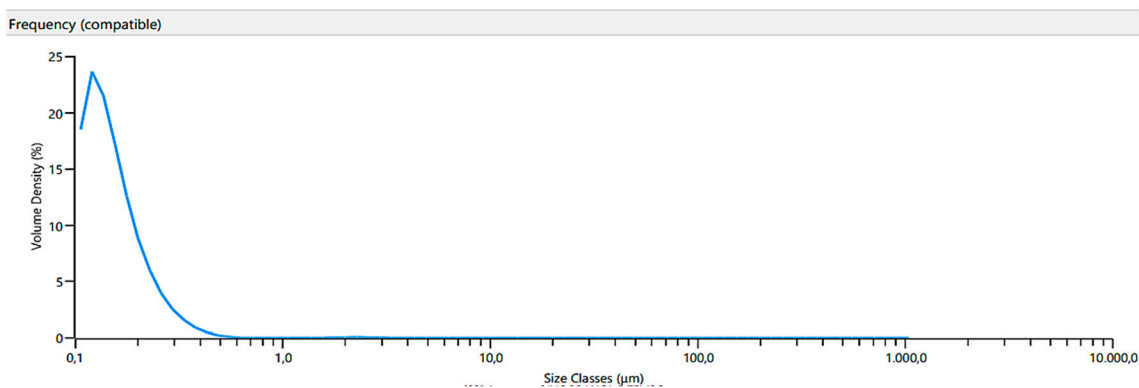

**Figure S3.** Representative granulometric profiles determined by laser diffraction at their initial time of NC SES (Figure 3SA) and NC placebo (Figure 3SB), respectively. The nanoparticles population is in the nanometric range (< 1 µm).

A

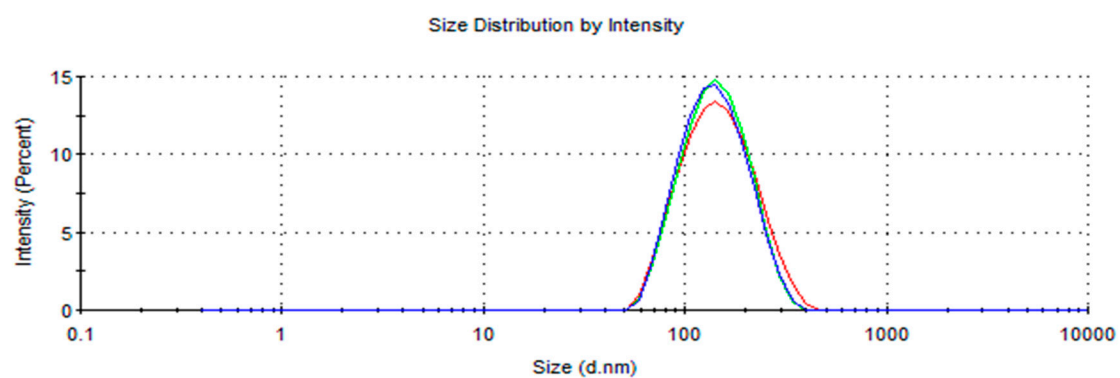

B

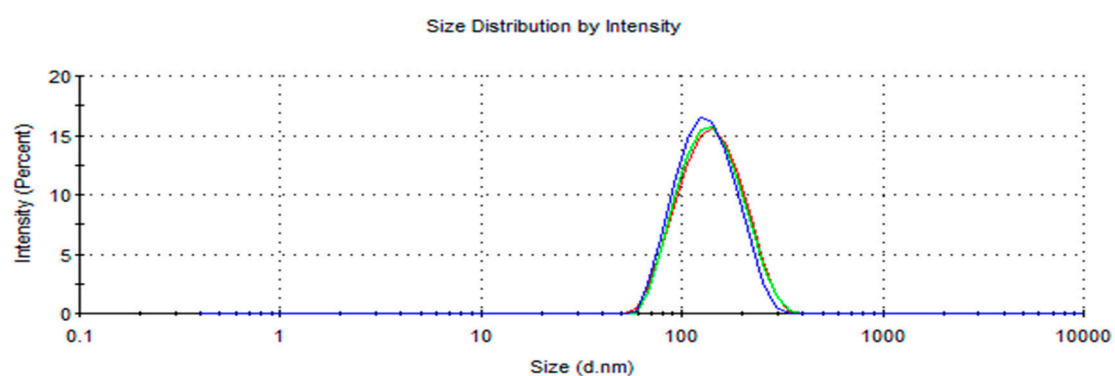

**Figure S4.** Representative images of size distribution curves determined by dynamic light scattering (DLS) at their initial time of the NC SES (A) and NC placebo (B), respectively.
